# Supplementary material for: Dense GeV electron–positron pairs generated by lasers in near-critical-density plasmas
Source: PubMed Central journal article supplement (PMC5171869; doi:10.1038/ncomms13686), 2016-12-14
Supplement: ncomms13686-s1.pdf [file ncomms13686-s1.pdf]

1 **Supplementary Figures:**

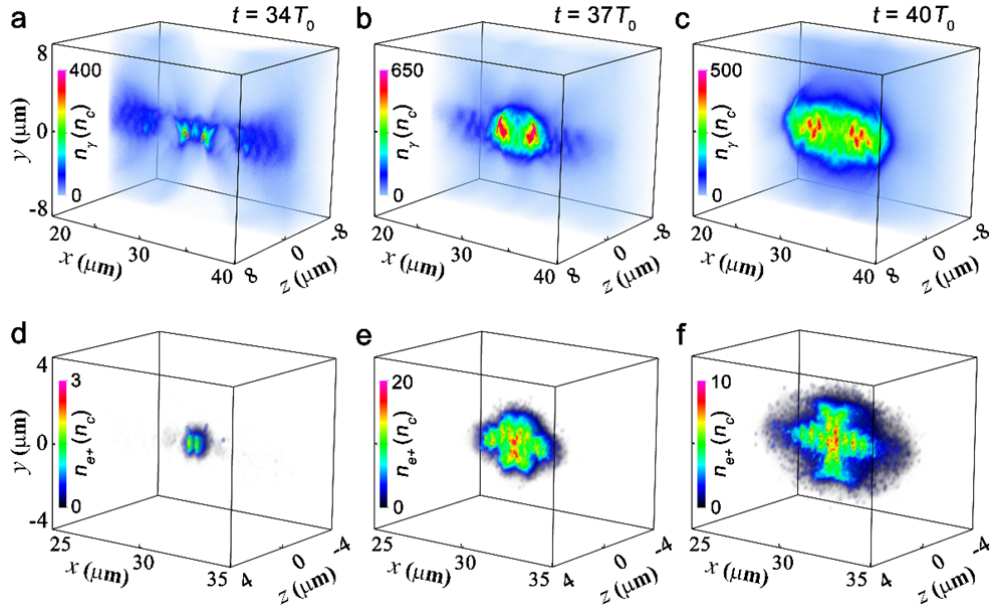

3 **Supplementary Figure 1. Density evolution of  $\gamma$ -photons and positrons.** Snapshots of the  $\gamma$ -photon  
 4 and positron density distribution at  $t = 34T_0$  (a, d),  $t = 37T_0$  (b, e) and  $t = 40T_0$  (c, f). Among  
 5 them, (a-c) display the  $\gamma$ -photon density distributions and (d-f) present the positron density  
 6 distributions.

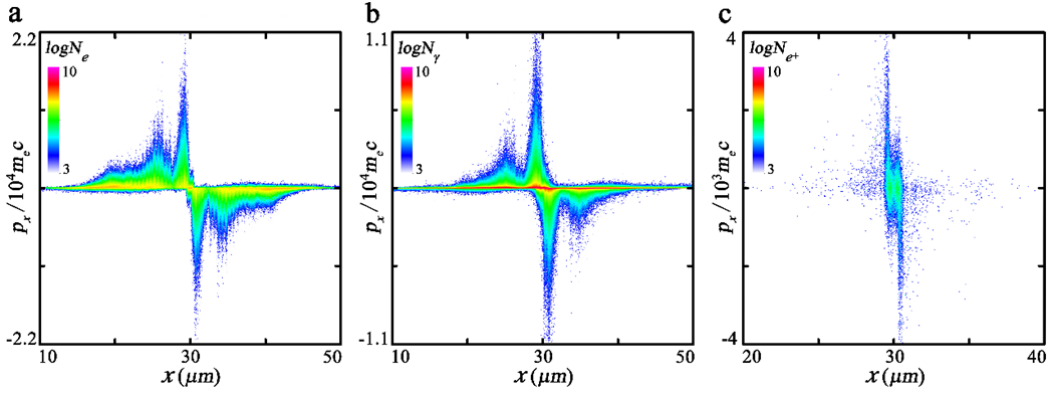

8 **Supplementary Figure 2. Collision of counter-propagating beams.** The distributions of (a) electrons,  
 9 (b)  $\gamma$ -photons, and (c) positrons in phase space ( $x, p_x$ ) at  $t = 34T_0$ . Here we only consider the zone  
 10  $r_0 = 1 \mu m$  where  $r_0$  indicates the off-axis radius.

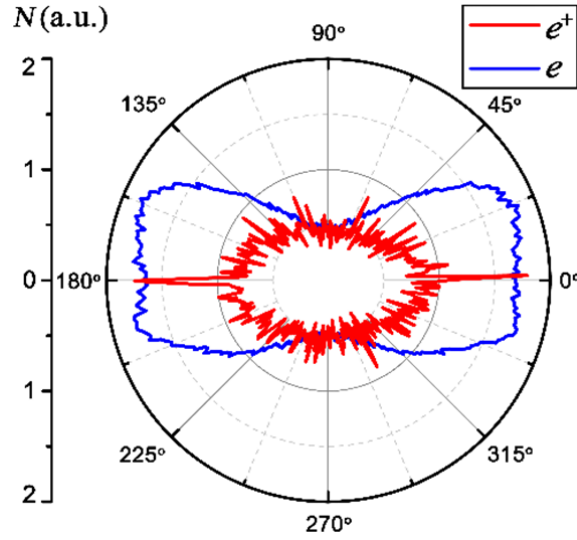

11

12 **Supplementary Figure 3. The off-axis angular distributions of the trapped electrons and**  
 13 **positrons.** Here we only consider the zone  $r_0 = 1 \mu\text{m}$  where  $r_0$  indicates the off-axis radius.

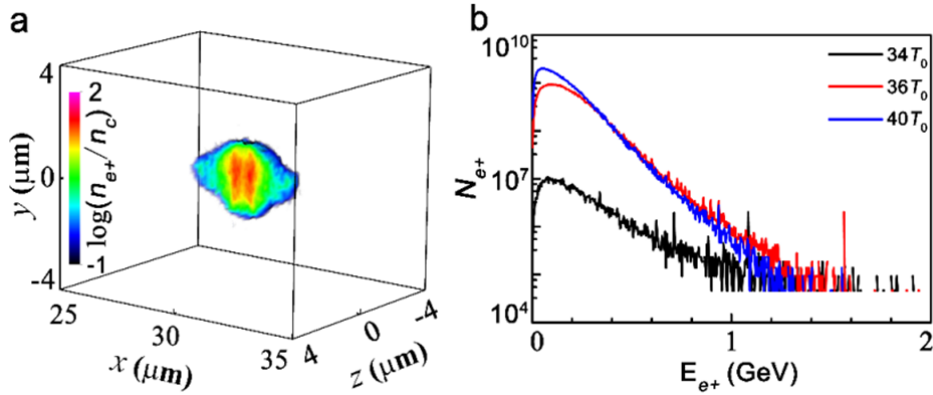

14

15 **Supplementary Figure 4. The simulation results using lasers with a square temporal profile.** (a)  
 16 **Density distribution of positrons.** (b) **Evolution of the positron energy spectrum.**

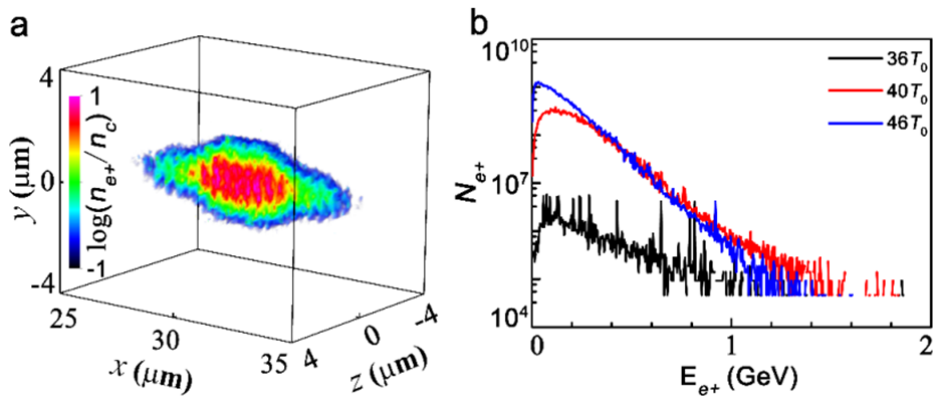

17

18 **Supplementary Figure 5. The simulation results using lasers with a Gaussian temporal profile.** (a)  
 19 **Density distribution of positrons.** (b) **Evolution of the positron energy spectrum.**

## 20 **Supplementary Note 1: Density evolution of $\gamma$ photons and positrons in 3D simulations**

21 Detailed simulation parameters are given in Methods. Supplementary Figure 1a-c  
22 illuminates the  $\gamma$ -photon density evolution at  $t = 34T_0$ ,  $37T_0$ , and  $40T_0$ . As expected, bright  
23  $\gamma$  rays are emitted in both near-critical-density plasmas and the peak photon density  
24 increases from  $400n_c$  at  $t = 34T_0$  to  $650n_c$  at  $t = 37T_0$ . A large number of electrons  
25 trapped in the laser fields oscillate and emit  $\gamma$ -photons, resulting in the decrease of the  
26 electron energy and increase of the low-energy electron flux, as illustrated in Fig. 3a in the  
27 main text. The lost energy is transferred to the photons and then positrons. At  $t = 34T_0$ , the  
28 nonlinear Compton backscattering becomes important and contributes to the  $\gamma$ -photon  
29 emission. Meanwhile, the Breit-Wheeler (BW) process is initiated and copious numbers of  
30 positrons are produced via the BW process. These positrons also oscillate in the laser fields  
31 and emit photons in a similar way to the electrons. This is the reason why we still observe an  
32 increase of the total photons in Fig. 3b in the main text, though the electron energy decreases  
33 significantly. These photons accumulate in the center, forming a hotspot with density up to  
34  $650n_c$  at  $t = 37T_0$ . Finally, the  $\gamma$ -photon yield is as high as  $\sim 1.4 \times 10^{14}$ .

35 The photons are mainly distributed in the laser axial direction and collide head-on with  
36 the counter-propagating laser waves to initiate the multi-photon BW process. Supplementary  
37 Figure 1d-f presents the positron density distribution at  $t = 34T_0$ ,  $37T_0$  and  $40T_0$ . As we  
38 can see, only a small amount of positrons are created at  $t = 34T_0$ , since the  
39 counter-propagating laser wave in the one cone is unapproachable for the  $\gamma$ -photons in the  
40 other cone so that their collision cross-section becomes very small at this time instant. The  
41 multi-photon BW process gets very efficient after  $t = 34T_0$  when the high-energy-density  
42  $\gamma$ -photons emitted collide with the counter-propagating laser waves.

43

## 44 **Supplementary Note 2: The off-axis angular distributions of positrons**

45 The head-on collision could be seen in the phase plots of the electrons/positrons, as  
46 shown in Supplementary Figure 2. At  $t = 34T_0$ , the beam #1, which has positive longitudinal  
47 momentum, collides head-on with the opposite-propagating beam #2 at  $x = 30\mu m$ . With  
48 time going on, the numbers of  $\gamma$ -photons and pairs increase, while the energy of electrons  
49 decreases significantly. The angular distributions of positrons and electrons are shown in  
50 Supplementary Figure 3. We can calculate the ‘peak-emittance’ by beam radius ( $\mu m$ ) $\times$ beam  
51 divergence (radians). Here, the beam radius we quote is  $r_0 = 1\mu m$  and the divergence we  
52 can take from Supplementary Figure 3 is about 1 degree for positron-spike and 30 degrees for  
53 positron bulk. Electron divergence is around 40 degrees. This would give peak-emittance at  
54 positron-angular-spike of  $3.5 \times 10^{-2} \mu m \cdot \text{radians}$ , peak-emittance at positron-angular-bulk of

55 1.05  $\mu\text{m}$ ·radians, and peak-emittance at electron-angular-bulk of 1.40  $\mu\text{m}$ ·radians. The  
 56 collisions are enhanced by the fact that all these electrons and positrons and  $\gamma$ -rays are at a  
 57 very high density in a very small volume at the same time of a few hundred femtosecond<sup>1-3</sup>.  
 58 This is very important for its application to a compact laser collider<sup>1</sup>. However, it is difficult  
 59 to give an exact collision numbers because different reactions correspond to different cross  
 60 section of collision. We estimate there are a very large number of millions of collisions in a  
 61 single laser-shot<sup>4</sup>. And this would mean that we can get collision information in a single-laser-  
 62 shot.

### 63 **Supplementary Note 3: Additional simulations with a Gaussian-type laser temporal** 64 **profile**

65 In experiments, we usually use a Gaussian temporal laser profile. Here, we carried out  
 66 additional simulations to compare the results to the square temporal laser pulse in the main  
 67 text. In the simulations, the laser field amplitude has a temporal profile of  $a_0(t) = a_0 g_{0,1}(t)$ ,  
 68 where  $g_0(t) = 1$  for the square temporal profile of the laser pulse and  $g_1(t) = e^{-(t-\tau_0)^2/\tau_0^2}$   
 69 for the Gaussian temporal profile. Here,  $\tau_0 = 12T_0$  and  $a_0 = 150$  are used. The simulation  
 70 results are shown in Supplementary Figure 4 and Supplementary Figure 5. It is obvious to see  
 71 that the magnitudes of positron energy, density, and energy spectrum in both cases are all at  
 72 similar levels.

73 We can also evaluate the impact of the laser temporal profile analytically. From Equation  
 74 2 in the main text, we can vary the laser temporal profile by the function  $g(t)$ . From  
 75 equations (2) and (3) in the manuscript, we can get the ratio of the positron yield by a laser  
 76 with a Gaussian temporal profile to that with a square one as follows:

$$77 \quad R_{N_{e^+}} = \frac{N_{e^+,Gauss}}{N_{e^+,square}} \sim \frac{1}{\tau_0(a_0 - a_{th})} \int_{t_1}^{t_2} [a_0 g_1(t) - a_{th}] g_1(t) dt. \quad (1)$$

78 Considering the fact that only the laser with a temporal intensity large than the threshold  
 79 value ( $a_{th} \sim 120$ ) can efficiently produce positrons (see Fig.4(c) in the main text), we can  
 80 estimate the positron production in the Gaussian laser temporal case easily. For the laser pulse  
 81 with  $a_0 = 150$ , we find  $R_{N_{e^+}} \sim 0.59$ . By comparison, the total positron yield in simulations  
 82 is  $\sim 6 \times 10^{10}$ , which is approximately 0.57 times that in the square laser case. This indicates  
 83 the validation of our estimation and the robustness of the scheme. Therefore, a Gaussian  
 84 temporal profile of laser pulse does not significantly change the positron production in our  
 85 configuration.

86  
 87  
 88  
 89  
 90  
 91  
 92

93 **Supplementary References**

- 94 1. Di Piazza, A., Müller, C., Hatsagortsyan, K. Z. & Keitel, C. H. Extremely high-intensity  
95 laser interactions with fundamental quantum systems. *Rev. Mod. Phys.* **84**, 1177-1288  
96 (2012).
- 97 2. Ridgers, C. P. *et al.* Dense Electron-Positron Plasmas and Ultraintense  $\gamma$  rays from  
98 Laser-Irradiated Solids. *Phys. Rev. Lett.* **108**, 165006 (2012).
- 99 3. Luo, W. *et al.* Dense electron-positron plasmas and gamma-ray bursts generation by  
100 counter-propagating quantum electrodynamics-strong laser interaction with solid targets.  
101 *Phys. Plasmas* **22**, 063112 (2015).
- 102 4. Zhu, K., Yuan, C. Z. & Ping, R. G. Cross sections of  $e^+e^- \rightarrow \gamma VV$  and  $e^+e^- \rightarrow \gamma\gamma V$ . *Phys. Rev.*  
103 *D* **78**, 036004 (2008).

104

105

106

107
